# Supplementary figures and images for: Synthesis and characterization of seven-coordinate tripodal imidazole complexes of iron(ii) and manganese(ii)
Source: Royal Society of Chemistry journal article supplement (doi:10.1039/b511566c), 2005-01-01

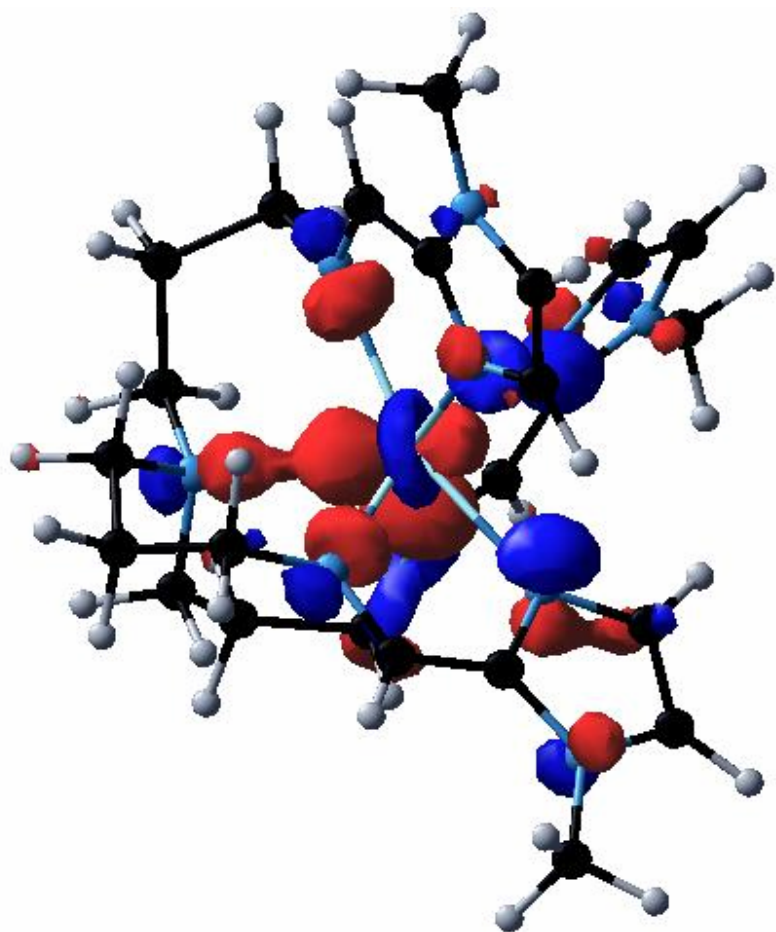

Supplement: b511566c.pdf [file b511566c.pdf]
